# Supplementary material
Source: publisher figshare collection journal article supplement (https://frontiersin.figshare.com/ndownloader/files/26650478)
Supplement: Supplementary file [file 26650478]

| Tissue reference name | State of cells | Experiment                                                                             | Age donor | Sex donor | Clinical information (cause of death)         |
|-----------------------|----------------|----------------------------------------------------------------------------------------|-----------|-----------|-----------------------------------------------|
| 100816                | Frozen         | Total splenocytes Evs interaction                                                      | 59        | Male      | Cardio-respiratory arrest and cerebral anoxia |
| 140717                | Fresh          | Cell separation Sample 1 and EVs interaction assays                                    | 52        | Male      | Ischemic stroke                               |
| 210917                | Fresh          | Cell separation Sample 2 and EVs interaction assays                                    | 25        | Female    | Cardio-respiratory arrest and cerebral anoxia |
| 20181114              | Fresh          | Immunophenotyping, T cell isolation by negative selection and EVs interaction assays 1 | 61        | Female    | Hemorrhagic stroke                            |
| 20181204              | Fresh          | Immunophenotyping, T cell isolation by negative selection and EVs interaction assays 2 | 53        | Male      | Cardio-respiratory arrest and cerebral anoxia |
| 20190201-01           | Fresh          | Immunophenotyping                                                                      | N/T       | N/T       | N/T                                           |
| 20190201-02           | Fresh          | Immunophenotyping                                                                      | 65        | Male      | N/T                                           |
| 20190207              | Fresh          | Immunophenotyping                                                                      | 62        | Female    | Hemorrhagic stroke                            |
| 20190222              | Fresh          | Immunophenotyping                                                                      | 66        | Male      | Cardio-respiratory arrest and cerebral anoxia |
